# Supplementary material for: Antioxidants and Therapeutic Targets in Ovarian Clear Cell Carcinoma
Source: PubMed Central journal article supplement (PMC7911626; doi:10.3390/antiox10020187), 2021-01-28
Supplement: antioxidants-10-00187-s001.pdf [file antioxidants-10-00187-s001.pdf]

## Supplementary Materials

**Supplementary Table 1. Upregulated 79 genes in vividly growing cancer spheres.**

| Up-Gene Symbol | Gene ID   | Fold change* | <i>p</i> -values** |
|----------------|-----------|--------------|--------------------|
| LITAF          | 9516      | 2.1207592    | 2.03E-04           |
| EFTUD1         | 79631     | 2.1516137    | 3.35E-04           |
| SMOC1          | 64093     | 4.4188356    | 8.81E-04           |
| CLDN24         | 100132463 | 3.3124933    | 9.66E-04           |
| MGLL           | 11343     | 2.2893085    | 9.91E-04           |
| SEPW1          | 6415      | 2.4701314    | 0.001132938        |
| C11orf96       | 387763    | 2.1179924    | 0.001323551        |
| PIGQ           | 9091      | 2.9436288    | 0.001981718        |
| MIR21          | 406991    | 4.4390764    | 0.002264138        |
| C19orf71       | 100128569 | 5.2451873    | 0.002283707        |
| ARRDC4         | 91947     | 4.73275      | 0.002435295        |
| ANKRD9         | 122416    | 2.7407963    | 0.002756929        |
| ARNT2          | 9915      | 2.3692644    | 0.003850413        |
| FIBCD1         | 84929     | 3.6863317    | 0.003900672        |
| MIR645         | 693230    | 2.7949657    | 0.00419125         |
| ZNHIT2         | 741       | 2.685165     | 0.004256217        |
| FLJ46906       | 441172    | 2.511955     | 0.004829411        |
| TP53INP2       | 58476     | 2.2619126    | 0.005131293        |
| UBE2Z          | 65264     | 2.0384877    | 0.005149033        |
| MSTO2P         | 100129405 | 2.575711     | 0.005210416        |
| RAB33A         | 9363      | 2.091018     | 0.005354992        |
| PDXP           | 57026     | 2.1576443    | 0.005404675        |
| CTRL           | 1506      | 2.0714319    | 0.005804448        |
| MOCOS          | 55034     | 2.1209774    | 0.006158605        |
| G0S2           | 50486     | 11.819523    | 0.006494332        |
| SNORA53        | 677832    | 2.264417     | 0.006705817        |
| REPIN1         | 29803     | 2.8456938    | 0.006773508        |
| SNORD83A       | 116937    | 3.1943386    | 0.006857268        |
| SGK223         | 157285    | 2.1261873    | 0.007217159        |
| INO80B         | 83444     | 2.150224     | 0.007590249        |
| FAM101B        | 359845    | 2.0070763    | 0.00805826         |
| MICAL2         | 9645      | 2.149102     | 0.008159041        |
| DEXI           | 28955     | 2.4966269    | 0.008739237        |
| CCNG2          | 901       | 2.0922632    | 0.008928092        |
| SH2D2A         | 9047      | 4.580897     | 0.009170096        |
| SNORA57        | 692158    | 2.170166     | 0.009371574        |
| CAPN10         | 11132     | 2.1131349    | 0.010219667        |
| YPEL3          | 83719     | 3.6506276    | 0.010413257        |
| SIRPA          | 140885    | 2.242258     | 0.010780468        |
| AMT            | 275       | 2.1465266    | 0.011944363        |
| UBALD2         | 283991    | 2.6380594    | 0.011965454        |
| TBC1D2B        | 23102     | 2.142051     | 0.013069578        |
| MIR573         | 693158    | 2.6520598    | 0.013145302        |
| CD81           | 975       | 2.4236543    | 0.013877614        |
| BHLHE41        | 79365     | 2.3765693    | 0.014037296        |
| FOXP4          | 116113    | 2.1288257    | 0.015122701        |
| SLC8B1         | 80024     | 2.6130712    | 0.01517499         |
| LIN7A          | 8825      | 2.4526713    | 0.015736822        |
| TRIM8          | 81603     | 2.2736151    | 0.015909232        |
| METTL24        | 728464    | 3.7812667    | 0.016054606        |
| ATP6V1B1       | 525       | 2.3591247    | 0.016124561        |
| C2CD4A         | 145741    | 2.9770472    | 0.016409228        |

|            |           |           |             |
|------------|-----------|-----------|-------------|
| RPL23AP82  | 284942    | 2.0265024 | 0.01709264  |
| RRAS       | 6237      | 3.475575  | 0.017852157 |
| GPC2       | 221914    | 2.199905  | 0.017908165 |
| ALDH1A3    | 220       | 2.1348593 | 0.018868158 |
| FURIN      | 5045      | 2.3936615 | 0.019097326 |
| ANKRD20A1  | 84210     | 3.9995637 | 0.01910931  |
| BBC3       | 27113     | 2.191234  | 0.019140063 |
| ATP13A2    | 23400     | 2.2020829 | 0.019162841 |
| TMEM8A     | 58986     | 2.692243  | 0.019301366 |
| TTLL3      | 26140     | 2.0526586 | 0.019753855 |
| SNORD49A   | 26800     | 2.5610104 | 0.020195134 |
| HOXD9      | 3235      | 2.687174  | 0.021076625 |
| ZNF513     | 130557    | 3.8625216 | 0.022652812 |
| PRR14      | 78994     | 2.6562395 | 0.02285078  |
| HSFX2      | 100130086 | 2.97543   | 0.023185235 |
| TPRA1      | 131601    | 2.0928478 | 0.02320262  |
| CXCL3      | 2921      | 6.3271894 | 0.023270097 |
| RDH10      | 157506    | 2.6080832 | 0.0239462   |
| CPNE2      | 221184    | 2.837128  | 0.024443708 |
| ABHD17C    | 58489     | 4.298869  | 0.024986247 |
| JARID2-AS1 | 100506681 | 2.3300421 | 0.025002286 |
| SSSCA1     | 10534     | 2.2366126 | 0.025128437 |
| APRT       | 353       | 2.3234353 | 0.025269138 |
| VWA5A      | 4013      | 2.4164116 | 0.025834825 |
| HIC1       | 3090      | 2.1755214 | 0.026201908 |
| LAMB3      | 3914      | 2.866365  | 0.026381055 |
| MAMLD1     | 10046     | 2.3176277 | 0.02675306  |

\*These genes were statistically upregulated in vividly growing spheres irrespective of continuously RAB39A-knockdown.

\*\*Replicate analysis (Strand NGS); Moderate T-test followed by Westfall Young correction was performed between vividly growing spheres and poor ones.
